# Supplementary material for: Down-regulation of flavin reductase and alcohol dehydrogenase-1 (ADH1) in metronidazole-resistant isolates of Trichomonas vaginalis
Source: PubMed Central journal article supplement — Mol Biochem Parasitol. 2012 Jun;183-222(2):177–83. doi: 10.1016/j.molbiopara.2012.03.003 (PMC3341570; doi:10.1016/j.molbiopara.2012.03.003), 2012-06
Supplement: mmc1.pdf [file mmc1.pdf]

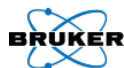

# Detailed Protein Report

## Project Info

**Name:** David Leitsch\_Tricho **Date:** November 28, 2011

## Sample Info & Protocols

**Name:** Trichos\_metronidazole suseptible **Date:** November 28, 2011

## Search Result Info

| Search Result                                | Location                                                                             | Search Engine  | Database                           | Ident. Compounds |
|----------------------------------------------|--------------------------------------------------------------------------------------|----------------|------------------------------------|------------------|
| HCT_NCBI_Eucaryota_PE_2011-11-28<br>08:27:32 | /David Leitsch_Tricho/Trichos_metronidazole<br>suseptible/DK_David_T39_BB5_01_3747.d | Mascot, 2.3.02 | NCBIInr,<br>NCBIInr_20110828.fasta | 47/499           |

**Protein 1:** alcohol dehydrogenase 1 [Trichomonas vaginalis G3]  
**Accession:** gi|154415151 **Score:** 1794.06  
**Database:** NCBIInr **MW [kDa]:** 39.10  
**Seq. Coverage [%]:** 57.30 % **pI:** 6.15  
**No. of Peptides:** 38

**Modification(s):** Carbamidomethyl, Oxidation, Deamidated

|             |            |            |            |            |            |            |            |            |            |            |            |
|-------------|------------|------------|------------|------------|------------|------------|------------|------------|------------|------------|------------|
| 10          | 20         | 30         | 40         | 50         | 60         | 70         | 80         | 90         | 100        | 110        | 120        |
| MTFELPKTMK  | AFAMRKIGEY | GWIEKPVPEC | GPNDICRPL  | ALAPCTSDIH | TVWAGAIGER | HDMILGHEAV | GQVVKIGSEV | KNLKVGDKVL | VPAVTPDWGS | EAAQEGFPAH | SGGMLGGWKF |
| 130         | 140        | 150        | 160        | 170        | 180        | 190        | 200        | 210        | 220        | 230        | 240        |
| SNFKDGVFAE  | YFHVNEADAN | LAKLPEGLTP | RDVIMCSDDM | TTGFHGAELA | EVLGDIVVV  | IGIGPVGLMS | VRGAALMGAS | RIFAVGSRPH | CCDTAVQYGA | TDIINYKNGD | IVEQILKATG |
| 250         | 260        | 270        | 280        | 290        | 300        | 310        | 320        | 330        | 340        | 350        | 360        |
| GKGVDRVILIA | GGDVHTFAQA | IKMIRAGGVI | GNVNYLGEGE | MIDVPRVEWG | VGMGHKFIHG | GLTPGGALRM | EKMANLIKYY | KVDPTKLITH | EFKGLEKVED | ALMLMKDKPV | DLIKPVLIE  |
| 370         |            |            |            |            |            |            |            |            |            |            |            |
| YNDKL       |            |            |            |            |            |            |            |            |            |            |            |

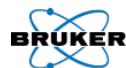

# Detailed Protein Report

| Cmpd. | No. of Cmpds. | m/z meas. | $\Delta$ m/z [ppm] | z | Rt [min] | Score | P | Range   | Sequence                               | Modification                              |
|-------|---------------|-----------|--------------------|---|----------|-------|---|---------|----------------------------------------|-------------------------------------------|
| 121   | 2             | 545.0000  | 81.24              | 3 | 40.8     | 107.4 | 0 | 61-75   | R.HDMILGHEAVGQVVK.I                    |                                           |
| 309   | 3             | 1051.5000 | -9.24              | 3 | 63.0     | 30.4  | 0 | 89-119  | K.VLVPVTPDWGSEAAQEGFPAHS<br>GGMLGGWK.F | Deamidated: 16                            |
| 305   | 4             | 1051.6000 | 397.92             | 3 | 62.7     | 44.0  | 0 | 89-119  | K.VLVPVTPDWGSEAAQEGFPAHS<br>GGMLGGWK.F |                                           |
| 280   | 3             | 793.1000  | 273.89             | 4 | 59.2     | 57.4  | 0 | 89-119  | K.VLVPVTPDWGSEAAQEGFPAHS<br>GGMLGGWK.F | Oxidation: 26; Deamidated: 16             |
| 248   | 2             | 1055.9000 | -84.71             | 2 | 55.3     | 54.6  | 0 | 125-143 | K.DGVFAEYFHVNEADANLAK.L                | Deamidated: 11                            |
| 256   | 6             | 704.4000  | 101.19             | 3 | 56.5     | 59.6  | 0 | 125-143 | K.DGVFAEYFHVNEADANLAK.L                | Deamidated: 16                            |
| 249   | 4             | 704.3000  | 425.11             | 3 | 55.7     | 99.9  | 0 | 125-143 | K.DGVFAEYFHVNEADANLAK.L                |                                           |
| 87    | 3             | 441.8000  | 100.03             | 2 | 36.2     | 64.2  | 0 | 144-151 | K.LPEGLTPR.D                           |                                           |
| 187   | 2             | 825.8000  | 531.01             | 3 | 48.6     | 39.9  | 0 | 152-173 | R.DVIMCSDMMTTGFHGAELAEVK.<br>L         | Carbamidomethyl: 5; Oxidation:<br>8, 9    |
| 149   | 2             | 831.0000  | 369.13             | 3 | 44.5     | 46.0  | 0 | 152-173 | R.DVIMCSDMMTTGFHGAELAEVK.<br>L         | Carbamidomethyl: 5; Oxidation:<br>4, 8, 9 |
| 177   | 4             | 825.6000  | 288.69             | 3 | 47.9     | 53.6  | 0 | 152-173 | R.DVIMCSDMMTTGFHGAELAEVK.<br>L         | Carbamidomethyl: 5; Oxidation:<br>4, 9    |
| 187   | 4             | 825.8000  | 531.01             | 3 | 48.6     | 58.9  | 0 | 152-173 | R.DVIMCSDMMTTGFHGAELAEVK.<br>L         | Carbamidomethyl: 5; Oxidation:<br>4, 8    |
| 38    | 2             | 417.2000  | -44.43             | 2 | 25.7     | 46.8  | 0 | 193-201 | R.GAALMGASR.I                          |                                           |
| 17    | 7             | 425.2000  | -37.62             | 2 | 17.4     | 55.2  | 0 | 193-201 | R.GAALMGASR.I                          | Oxidation: 5                              |
| 211   | 1             | 565.2000  | -192.11            | 2 | 51.3     | 36.6  | 0 | 228-237 | K.NGDIVEQILK.A                         | Deamidated: 7                             |
| 215   | 5             | 565.3000  | 855.86             | 2 | 51.6     | 54.3  | 0 | 228-237 | K.NGDIVEQILK.A                         |                                           |
| 244   | 4             | 565.9000  | 1046.15            | 2 | 54.8     | 57.5  | 0 | 228-237 | K.NGDIVEQILK.A                         | Deamidated: 1                             |
| 210   | 1             | 547.6000  | -70.11             | 3 | 51.0     | 46.4  | 0 | 247-262 | R.VIIAGGDVHTFAQAIK.M                   | Deamidated: 13                            |
| 189   | 6             | 547.4000  | 163.73             | 3 | 49.0     | 130.7 | 0 | 247-262 | R.VIIAGGDVHTFAQAIK.M                   |                                           |
| 255   | 2             | 1080.9000 | -123.34            | 2 | 56.3     | 68.8  | 0 | 266-286 | R.AGGVIGNVNYLGE GEMIDVPR.V             | Deamidated: 9                             |
| 255   | 2             | 1080.9000 | -123.34            | 2 | 56.3     | 77.8  | 0 | 266-286 | R.AGGVIGNVNYLGE GEMIDVPR.V             | Deamidated: 7                             |
| 228   | 2             | 1088.5000 | -35.63             | 2 | 53.2     | 83.0  | 0 | 266-286 | R.AGGVIGNVNYLGE GEMIDVPR.V             | Oxidation: 16                             |
| 255   | 2             | 1080.9000 | 331.94             | 2 | 56.3     | 99.7  | 0 | 266-286 | R.AGGVIGNVNYLGE GEMIDVPR.V             |                                           |
| 238   | 2             | 726.6000  | -116.00            | 3 | 54.2     | 20.4  | 0 | 266-286 | R.AGGVIGNVNYLGE GEMIDVPR.V             | Oxidation: 16; Deamidated: 7, 9           |
| 238   | 4             | 726.6000  | 335.53             | 3 | 54.2     | 35.0  | 0 | 266-286 | R.AGGVIGNVNYLGE GEMIDVPR.V             | Oxidation: 16; Deamidated: 7              |
| 238   | 4             | 726.6000  | 335.53             | 3 | 54.2     | 39.5  | 0 | 266-286 | R.AGGVIGNVNYLGE GEMIDVPR.V             | Oxidation: 16; Deamidated: 9              |



# Detailed Protein Report

| Cmpd. | No. of Cmpds. | m/z meas. | $\Delta$ m/z [ppm] | z | Rt [min] | Score | P | Range   | Sequence                 | Modification    |
|-------|---------------|-----------|--------------------|---|----------|-------|---|---------|--------------------------|-----------------|
| 59    | 1             | 558.2000  | -123.16            | 2 | 30.3     | 31.2  | 0 | 287-296 | R.VEWGVGMGHK.F           | Oxidation: 7    |
| 88    | 1             | 550.6000  | 597.34             | 2 | 36.4     | 43.9  | 0 | 287-296 | R.VEWGVGMGHK.F           |                 |
| 119   | 3             | 432.7000  | 280.15             | 3 | 40.4     | 74.3  | 0 | 297-309 | K.FIHGGLTPGGALR.M        |                 |
| 54    | 4             | 444.2000  | -119.08            | 2 | 29.2     | 37.8  | 0 | 327-333 | K.LITHEFK.G              |                 |
| 150   | 3             | 533.8000  | 994.66             | 2 | 44.4     | 47.2  | 0 | 338-346 | K.VEDALMLMK.D            | Oxidation: 6    |
| 109   | 3             | 533.3000  | 57.05              | 2 | 39.2     | 50.0  | 0 | 338-346 | K.VEDALMLMK.D            | Oxidation: 8    |
| 176   | 1             | 525.3000  | 53.08              | 2 | 47.6     | 54.7  | 0 | 338-346 | K.VEDALMLMK.D            |                 |
| 84    | 3             | 541.6000  | 615.16             | 2 | 36.0     | 59.1  | 0 | 338-346 | K.VEDALMLMK.D            | Oxidation: 6, 8 |
| 261   | 2             | 700.5000  | 621.85             | 3 | 56.9     | 58.8  | 0 | 347-364 | K.DKPVDLIKPVVLLIEYNDK.L  |                 |
| 263   | 1             | 525.6000  | 102.14             | 4 | 57.1     | 35.2  | 0 | 347-364 | K.DKPVDLIKPVVLLIEYNDK.L  | Deamidated: 16  |
| 301   | 4             | 738.1000  | 17.13              | 3 | 61.6     | 48.9  | 1 | 347-365 | K.DKPVDLIKPVVLLIEYNDK.L- | Deamidated: 16  |
| 301   | 4             | 738.1000  | 461.74             | 3 | 61.6     | 88.3  | 1 | 347-365 | K.DKPVDLIKPVVLLIEYNDK.L- |                 |

**Protein 2:** keratin 9 (epidermolytic palmoplantar keratoderma) [Homo sapiens]

**Accession:** gi|119581148

**Score:** 330.87

**Database:** NCBIInr

**MW [kDa]:** 57.50

**Seq. Coverage [%]:** 19.50 %

**pl:** 7.61

**No. of Peptides:** 16

**Modification(s):** Deamidated



# Detailed Protein Report

|            |            |            |            |            |            |            |            |            |            |            |            |           |
|------------|------------|------------|------------|------------|------------|------------|------------|------------|------------|------------|------------|-----------|
| 10         | 20         | 30         | 40         | 50         | 60         | 70         | 80         | 90         | 100        | 110        | 120        |           |
| MSCRQFSSSY | LSRSGGGGGG | GLGSGGSIRS | SYSRFSSSGG | GGGGRFSSS  | SGYGGSSRV  | CGRGGGSFG  | YSYGGSGGG  | FSASSLGGGF | GGGSRFGGA  | SGGGYSSSGG | FGGGFGGGSG |           |
| 130        | 140        | 150        | 160        | 170        | 180        | 190        | 200        | 210        | 220        | 230        | 240        |           |
| GGFGGGYGSG | FGGFGGFGG  | AGGGDGGILT | ANEKSTMQEL | NSRLASYLDK | VQALEEANN  | LENKIQDWYD | KKGPAAIQKN | YSPYYNTIDD | LKDQIVDLTV | GNNRLLDID  | NTRMTLDDFR |           |
| 250        | 260        | 270        | 280        | 290        | 300        | 310        | 320        | 330        | 340        | 350        | 360        |           |
| IKFEMEQLNR | QGVADINGL  | RQVLDNLIME | KSDLEMQYET | LQEELMALKK | NHKEEMSQLT | GQNSGDVNV  | INVAPGKDLT | KTLNDRQY   | EQLIAKNRKD | IENQYETQIT | QIEHEVSSSG |           |
| 370        | 380        | 390        | 400        | 410        | 420        | 430        | 440        | 450        | 460        | 470        | 480        |           |
| QEVQSSAK   | EV         | TQLRHGVQEL | EIELQSQLSK | KAALKSLED  | TKNRYCGQLQ | MIQEISNLE  | AQITDVRQEI | ECQNQEYSL  | LSIKMRLEKE | IETYHNLE   | GQEDFESSGA | GKIGLGRRG |
| 490        | 500        | 510        | 520        | 530        |            |            |            |            |            |            |            |           |
| SGGSYGRGIQ | GRKWRQLWWR | RKWRWLWWRK | WVQGRKWRQL | RWRKFWRR   |            |            |            |            |            |            |            |           |

| Cmpd. | No. of Cmpds. | m/z meas. | $\Delta$ m/z [ppm] | z | Rt [min] | Score | P | Range   | Sequence                              | Modification   |
|-------|---------------|-----------|--------------------|---|----------|-------|---|---------|---------------------------------------|----------------|
| 40    | 2             | 616.7000  | -166.24            | 2 | 25.9     | 72.6  | 0 | 14-29   | R.SGGGGGGGLGSGGSIR.S                  |                |
| 26    | 2             | 618.3000  | 51.76              | 2 | 21.4     | 61.0  | 0 | 47-59   | R.FSSSSGYGGGSSR.V                     |                |
| 39    | 2             | 533.2000  | -99.96             | 2 | 25.9     | 50.5  | 0 | 155-163 | K.STMQELNSR.L                         |                |
| 336   | 1             | 968.5000  | 31.29              | 3 | 68.3     | 39.2  | 1 | 200-224 | K.NYSPYYNTIDDLKDQIVDLTVGN<br>NK.T     | Deamidated: 24 |
| 336   | 1             | 968.5000  | 31.29              | 3 | 68.3     | 39.2  | 1 | 200-224 | K.NYSPYYNTIDDLKDQIVDLTVGN<br>NK.T     | Deamidated: 23 |
| 336   | 1             | 968.5000  | 31.29              | 3 | 68.3     | 42.8  | 1 | 200-224 | K.NYSPYYNTIDDLKDQIVDLTVGN<br>NK.T     | Deamidated: 7  |
| 336   | 1             | 968.5000  | 31.29              | 3 | 68.3     | 48.3  | 1 | 200-224 | K.NYSPYYNTIDDLKDQIVDLTVGN<br>NK.T     | Deamidated: 1  |
| 336   | 1             | 968.5000  | 370.10             | 3 | 68.3     | 48.5  | 1 | 200-224 | K.NYSPYYNTIDDLKDQIVDLTVGN<br>NK.T     |                |
| 336   | 1             | 968.5000  | 31.29              | 3 | 68.3     | 51.5  | 1 | 200-224 | K.NYSPYYNTIDDLKDQIVDLTVGN<br>NK.T     | Deamidated: 15 |
| 97    | 1             | 579.3000  | 1.55               | 2 | 37.8     | 33.7  | 0 | 251-261 | R.QGVADINGLR.Q                        |                |
| 277   | 1             | 1089.3000 | 118.61             | 3 | 58.7     | 38.8  | 0 | 340-368 | K.DIENQYETQITQIEHEVSSSGQE<br>VQSSAK.E | Deamidated: 22 |



# Detailed Protein Report

| Cmpd. | No. of Cmpds. | m/z meas. | $\Delta$ m/z [ppm] | z | Rt [min] | Score | P | Range   | Sequence                              | Modification   |
|-------|---------------|-----------|--------------------|---|----------|-------|---|---------|---------------------------------------|----------------|
| 277   | 1             | 1089.3000 | 419.89             | 3 | 58.7     | 45.7  | 0 | 340-368 | K.DIENQYETQITQIEHEVSSSGQE<br>VQSSAK.E |                |
| 277   | 1             | 1089.3000 | 118.61             | 3 | 58.7     | 49.6  | 0 | 340-368 | K.DIENQYETQITQIEHEVSSSGQE<br>VQSSAK.E | Deamidated: 4  |
| 277   | 1             | 1089.3000 | 118.61             | 3 | 58.7     | 51.7  | 0 | 340-368 | K.DIENQYETQITQIEHEVSSSGQE<br>VQSSAK.E | Deamidated: 5  |
| 277   | 1             | 1089.3000 | 118.61             | 3 | 58.7     | 52.6  | 0 | 340-368 | K.DIENQYETQITQIEHEVSSSGQE<br>VQSSAK.E | Deamidated: 12 |
| 277   | 1             | 1089.3000 | 118.61             | 3 | 58.7     | 61.5  | 0 | 340-368 | K.DIENQYETQITQIEHEVSSSGQE<br>VQSSAK.E | Deamidated: 9  |

**Protein 3:** Chain E, Leech-Derived Trypsin InhibitorTRYPSIN COMPLEX

**Accession:** gi|3318722

**Score:** 107.15

**Database:** NCBIInr

**MW [kDa]:** 23.50

**Seq. Coverage [%]:** 4.50 %

**pl:** 9.53

**No. of Peptides:** 3

**Modification(s):** Deamidated

|            |            |            |            |            |            |            |            |            |             |            |            |
|------------|------------|------------|------------|------------|------------|------------|------------|------------|-------------|------------|------------|
| 10         | 20         | 30         | 40         | 50         | 60         | 70         | 80         | 90         | 100         | 110        | 120        |
| IVGGYTCAAN | SIPYQVSLNS | GSHFCGGSLI | NSQWVSAAH  | CYKSRIQVRL | GEHNIDVLEG | NEQFINAAKI | ITHPNFNGNT | LDNDIMLIK  | LSSPATLNSRV | ATVSLPRSCA | AAGTECLISG |
| 130        | 140        | 150        | 160        | 170        | 180        | 190        | 200        | 210        | 220         | 230        |            |
| WGNTKSSGSS | YPSLLQCLKA | PVLSOSSCKS | SYPGQITGNM | ICVGFLEGGK | DSCQGDSSGP | VVCNGQLQGI | VSWGYGCAQK | NKPGVYTKVC | NYVNWIQQTI  | AAN        |            |

| Cmpd. | No. of Cmpds. | m/z meas. | $\Delta$ m/z [ppm] | z | Rt [min] | Score | P | Range | Sequence       | Modification  |
|-------|---------------|-----------|--------------------|---|----------|-------|---|-------|----------------|---------------|
| 64    | 1             | 523.6000  | -338.83            | 2 | 31.2     | 32.2  | 0 | 90-99 | K.LSSPATLNSR.V | Deamidated: 8 |
| 61    | 1             | 523.3000  | 944.84             | 2 | 30.8     | 44.0  | 0 | 90-99 | K.LSSPATLISR.V |               |
| 64    | 4             | 523.6000  | 601.08             | 2 | 31.2     | 63.1  | 0 | 90-99 | K.LSSPATLNSR.V |               |

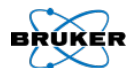

# Detailed Protein Report

**Protein 4:** malic enzyme [Trichomonas vaginalis G3]  
**Accession:** gi|123402375 **Score:** 63.07  
**Database:** NCBIInr **MW [kDa]:** 16.80  
**Seq. Coverage [%]:** 6.90 % **pl:** 5.42  
**No. of Peptides:** 1

|            |            |            |            |            |            |            |            |            |            |            |            |
|------------|------------|------------|------------|------------|------------|------------|------------|------------|------------|------------|------------|
| 10         | 20         | 30         | 40         | 50         | 60         | 70         | 80         | 90         | 100        | 110        | 120        |
| MAEITNSDLK | KGTLAEVIK  | ADVFIGVSAP | KTLTQEMVKS | MAEKPIVFPM | ANPIPEIMPD | EAKAAGAAVV | GTGRSDFPNQ | INNVLAFFAL | FRGALDVRAS | RITNEMNIAA | ARAIASLVSD |
| 130        | 140        | 150        | 160        |            |            |            |            |            |            |            |            |
| EELSADYILP | NPFDKRIKET | VSKAVAEAAI | KSGVARINQ  |            |            |            |            |            |            |            |            |

| Cmpd. | No. of Cmpds. | m/z meas. | $\Delta$ m/z [ppm] | z | Rt [min] | Score | P | Range | Sequence       | Modification |
|-------|---------------|-----------|--------------------|---|----------|-------|---|-------|----------------|--------------|
| 27    | 2             | 465.3000  | 82.12              | 2 | 22.4     | 63.1  | 0 | 64-74 | K.AAGAAVVGTR.S |              |
